# Supplementary material for: Artificial Intelligence in Esophagectomy: A Systematic Review
Source: MDPI journal article supplement (doi:10.3390/jcm15062169), 2026-03-12
Supplement: s1 [file Articles data and results.pdf › Articles data and results.pdf]

| Study (Year)              | AI Task                                          | Key Performance Metrics                                                                                                                                                                                                                                          |
|---------------------------|--------------------------------------------------|------------------------------------------------------------------------------------------------------------------------------------------------------------------------------------------------------------------------------------------------------------------|
| Furube et al. (2025)      | Real-time detection of excessive traction on RLN | Correct detection of unintended nerve traction: <b>84.4%</b> ; ETR value correlated with traction degree; AI detected ET earlier than NIM signal in representative case (pre-injury potential)                                                                   |
| Furube et al. (2024)      | RLN segmentation and recognition metrics         | AUC: <b>0.92</b> (left), <b>0.88</b> (right); Dice: <b>0.72</b> ; Sensitivity: <b>0.86</b> ; Specificity: <b>0.89</b> ; IoU: <b>0.40 ± 0.26</b> (right), <b>0.34 ± 0.27</b> (left); surgeon assistance improved RLN recognition rates and IoU with AI assistance |
| Brandenburg et al. (2023) | Surgomic feature recognition (Active Learning)   | Mean F1-score: <b>0.75 ± 0.16</b> (all features); instrument detection F1: <b>0.80 ± 0.17</b> ; inter-rater agreement $\kappa > 0.82$ ; AL improved rare instrument sample selection and performance vs EQS                                                      |
| den Boer et al. (2023)    | Anatomical structure segmentation (Bayesian NN)  | Median Dice: <b>0.79</b> (azygos/vena cava), <b>0.74</b> (aorta), <b>0.89</b> (lung); algorithm comparable to expert annotations; inference time ~ <b>0.026 s/frame (39 Hz)</b>                                                                                  |
| Sato et al. (2022)        | Recurrent laryngeal nerve (RLN) segmentation     | Dice coefficient: 0.58 (AI) vs 0.62 (expert) vs 0.47 (general surgeons); AI performance superior to general surgeons (p = 0.019)                                                                                                                                 |
| Takeuchi et al. (2022)    | Surgical phase recognition                       | Overall accuracy: <b>84%</b> ; precision: <b>~0.84</b> ; per-phase recall: <b>58–93%</b>                                                                                                                                                                         |
