# Supplementary material for: Artificial Intelligence in Esophagectomy: A Systematic Review
Source: MDPI journal article supplement (doi:10.3390/jcm15062169), 2026-03-12
Supplement: s1 [file Intraoperative Applications of Artificial Intelligence in Esophagectomy.pdf › Intraoperative Applications of Artificial Intelligence in Esophagectomy.pdf]

| AI Application Domain                               | Primary Function                                      | Representative Intraoperative Use                                                | Typical AI Methods                                                        |
|-----------------------------------------------------|-------------------------------------------------------|----------------------------------------------------------------------------------|---------------------------------------------------------------------------|
| <b>Anatomy detection and recognition</b>            | Identification and delineation of critical structures | Real-time recognition of the RLN, aorta, azygos vein, and lung during dissection | CNN-based deep learning, semantic segmentation, and transfer learning     |
| <b>Surgical phase recognition</b>                   | Temporal classification of procedural steps           | Automated identification of operative phases to provide contextual awareness     | Deep learning with CNNs and temporal models (e.g., RNN/LSTM)              |
| <b>Pattern and event detection</b>                  | Detection of predefined intraoperative risk patterns  | Identification of excessive traction, bleeding, smoke, or unsafe tissue handling | Deep learning classification models, CNNs, and active learning            |
| <b>Instrument detection and tracking</b>            | Recognition and localization of surgical tools        | Real-time tracking of instruments to infer surgical intent and motion            | Computer vision and CNN-based object detection                            |
| <b>Intraoperative guidance and decision support</b> | Augmented cognition and risk mitigation               | Visual overlays, alerts for nerve traction, and anatomy highlighting             | AI-augmented computer vision, augmented reality, and ML-based risk models |
