# Supplementary material for: Artificial Intelligence in Esophagectomy: A Systematic Review
Source: MDPI journal article supplement (doi:10.3390/jcm15062169), 2026-03-12
Supplement: s1 [file Search strategy.pdf › Search strategy.pdf]

Pubmed search strategy:

```
(( esophagectomy[Title/Abstract] OR oesophagectomy[Title/Abstract] OR "Ivor-Lewis" OR "Mckeown" OR oesophagectomy[Title/Abstract] ) AND ( "artificial intelligence"[Title/Abstract] OR "machine learning"[Title/Abstract] OR "deep learning"[Title/Abstract] OR "computer vision"[Title/Abstract] OR "neural network*" [Title/Abstract] OR "anatomy detection"[Title/Abstract] ) AND ( "intraoperative"[Title/Abstract] OR "intra-operative"[Title/Abstract] OR "real-time"[Title/Abstract] OR "surgical guidance"[Title/Abstract] ) ) AND (( esophagectomy[Title/Abstract] OR "Ivor-Lewis" OR Mckeown OR oesophagectomy[Title/Abstract] ) AND ( "artificial intelligence"[Title/Abstract] OR "machine learning"[Title/Abstract] OR "deep learning"[Title/Abstract] OR "computer vision"[Title/Abstract] OR "neural network*" [Title/Abstract] OR "anatomy detection"[Title/Abstract] ) AND ( "intraoperative"[Title/Abstract] OR "intra-operative"[Title/Abstract] OR "real-time"[Title/Abstract] OR "surgical guidance"[Title/Abstract] ))
```

Scopus search strategy:

```
(TITLE-ABS-KEY("esophagectomy" OR "oesophagectomy") AND TITLE-ABS-KEY("artificial intelligence" OR "machine learning" OR "deep learning" OR "computer vision" OR "neural network*"))
```

Web of Science search strategy:

```
TS=(esophagectomy OR oesophagectomy)
```

AND

```
TS=("artificial intelligence" OR "machine learning" OR "deep learning" OR "computer vision" OR "neural network*")
```
